# Supplementary material for: The origin and widespread occurrence of Sli-based self-compatibility in potato
Source: PubMed Central journal article supplement (PMC7419354; doi:10.1007/s00122-020-03627-8), 2020-06-08

Clot et al, The origin and widespread occurrence of Sli based self-compatibility in potato.  
ESM1: Pedigrees of population IVP16-587 and IVP17-618. Spontaneous berry set has been observed in the clones highlighted in blue

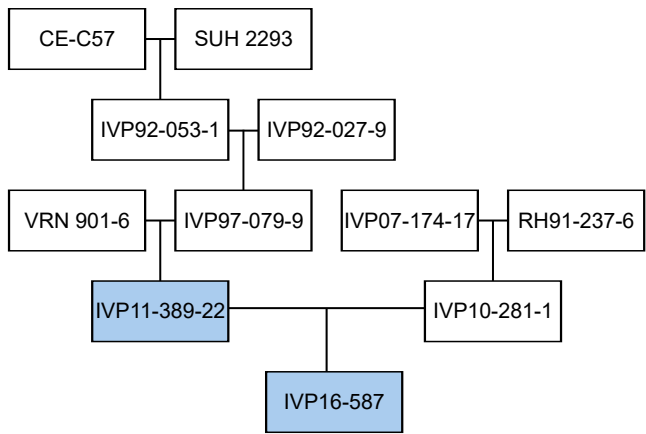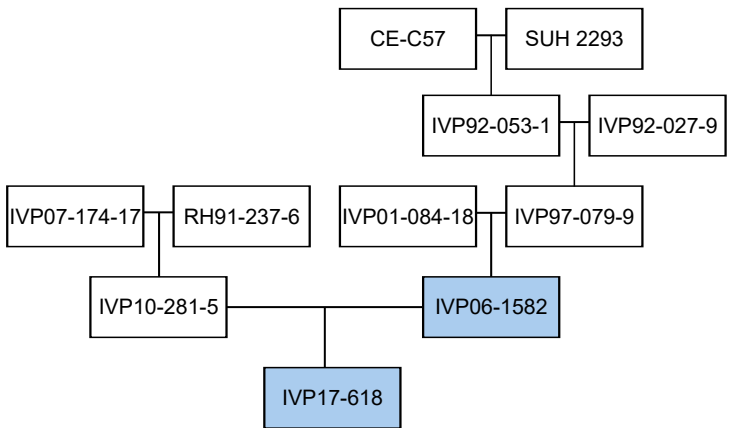

Supplement: 122_2020_3627_MOESM1_ESM.pdf [file 122_2020_3627_MOESM1_ESM.pdf]
