# Supplementary material for: The origin and widespread occurrence of Sli-based self-compatibility in potato
Source: PubMed Central journal article supplement (PMC7419354; doi:10.1007/s00122-020-03627-8), 2020-06-08

Clot et al, The origin and widespread occurrence of Sli based self-compatibility in potato.

ESM6: Boundaries of the SC haplotype. IVG viewer was used to show map positions of SC specific k-mers on DM v4.03.

### a) Intersection between k-mers in coupling with SC in IVP16-587 and IVP17-618

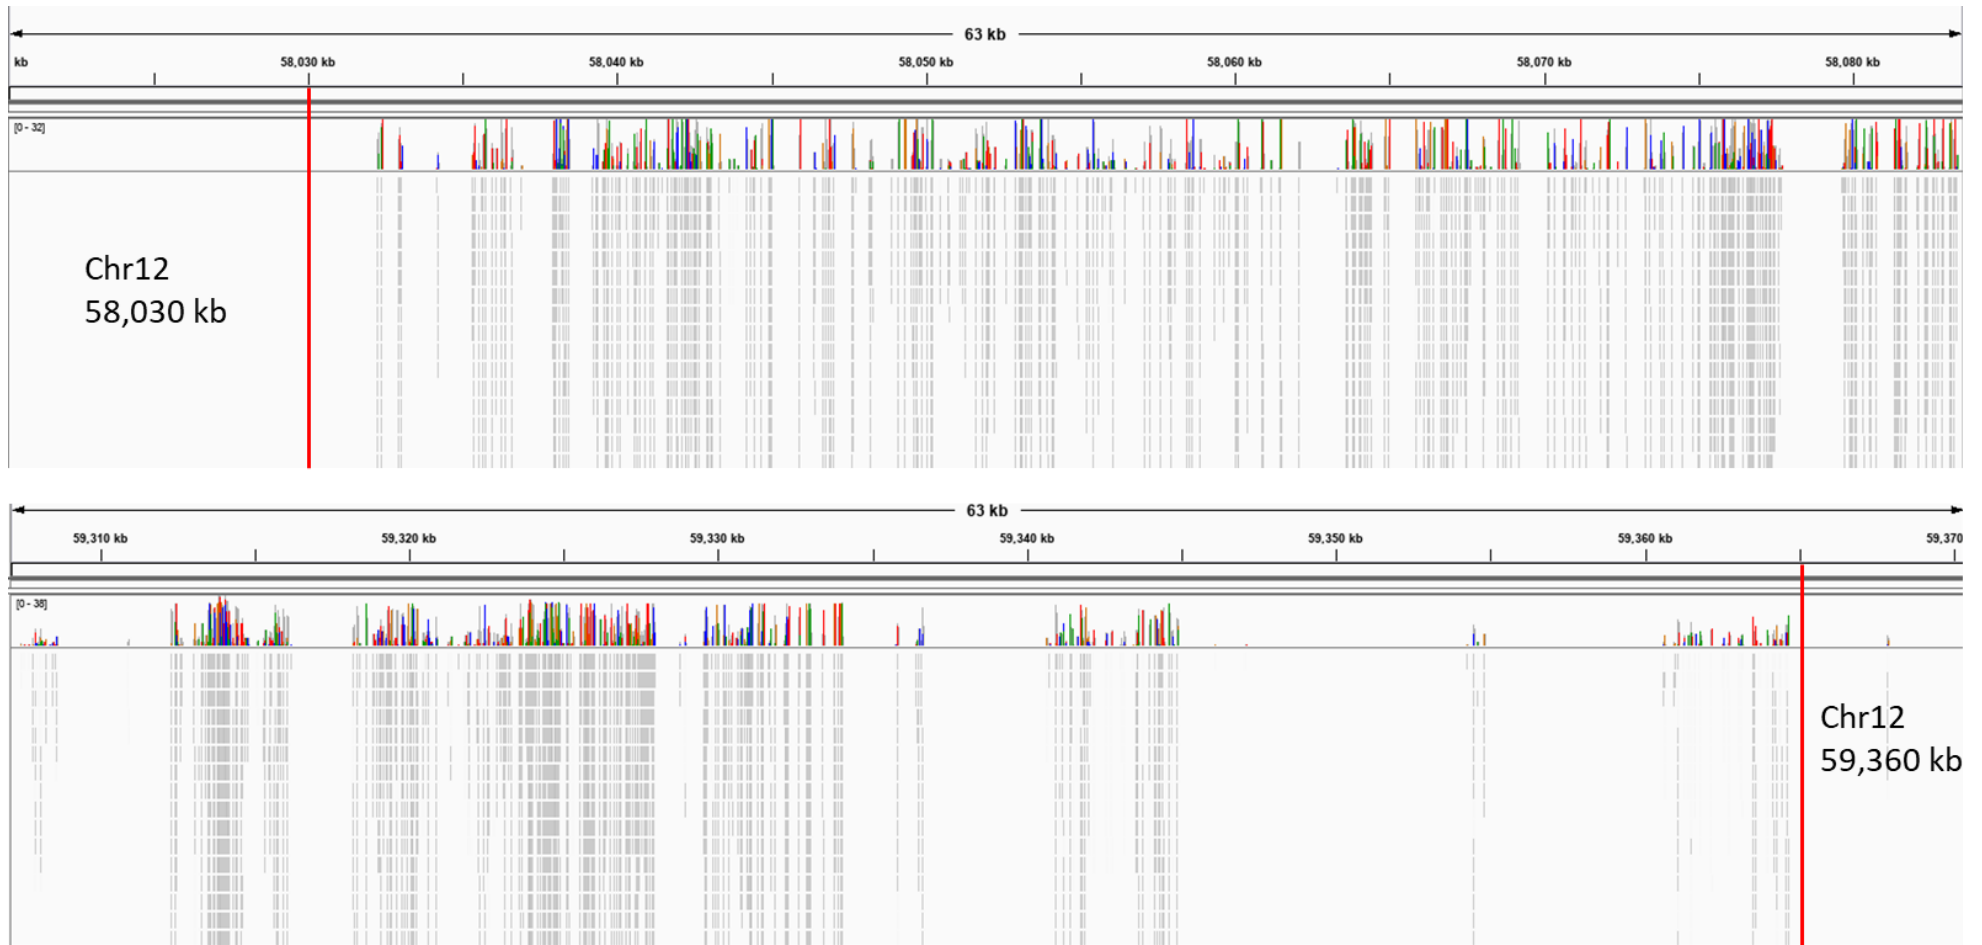

**b) Intersection of shared k-mers in coupling phase with SC in IVP16-587 and IVP17-618 and M6 (*Sli* candidate region)**

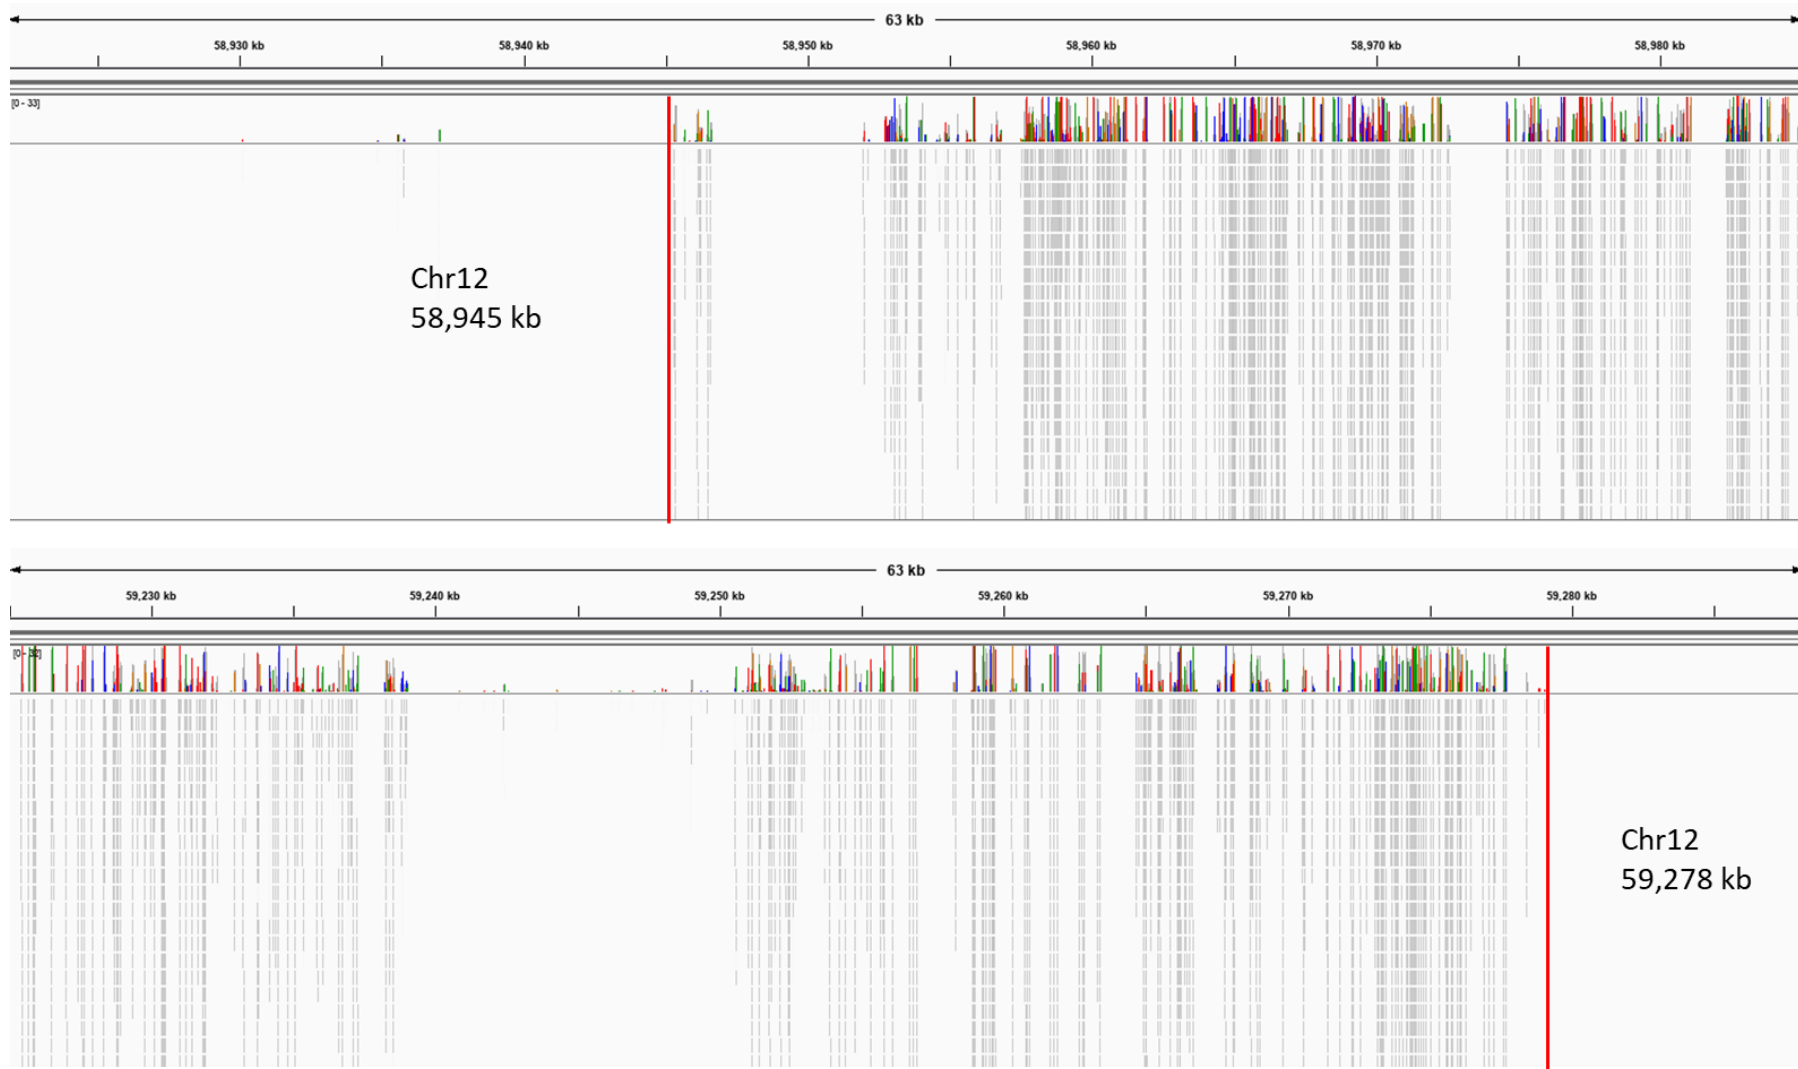

Supplement: 122_2020_3627_MOESM6_ESM.pdf [file 122_2020_3627_MOESM6_ESM.pdf]
