# Supplementary material for: The origin and widespread occurrence of Sli-based self-compatibility in potato
Source: PubMed Central journal article supplement (PMC7419354; doi:10.1007/s00122-020-03627-8), 2020-06-08

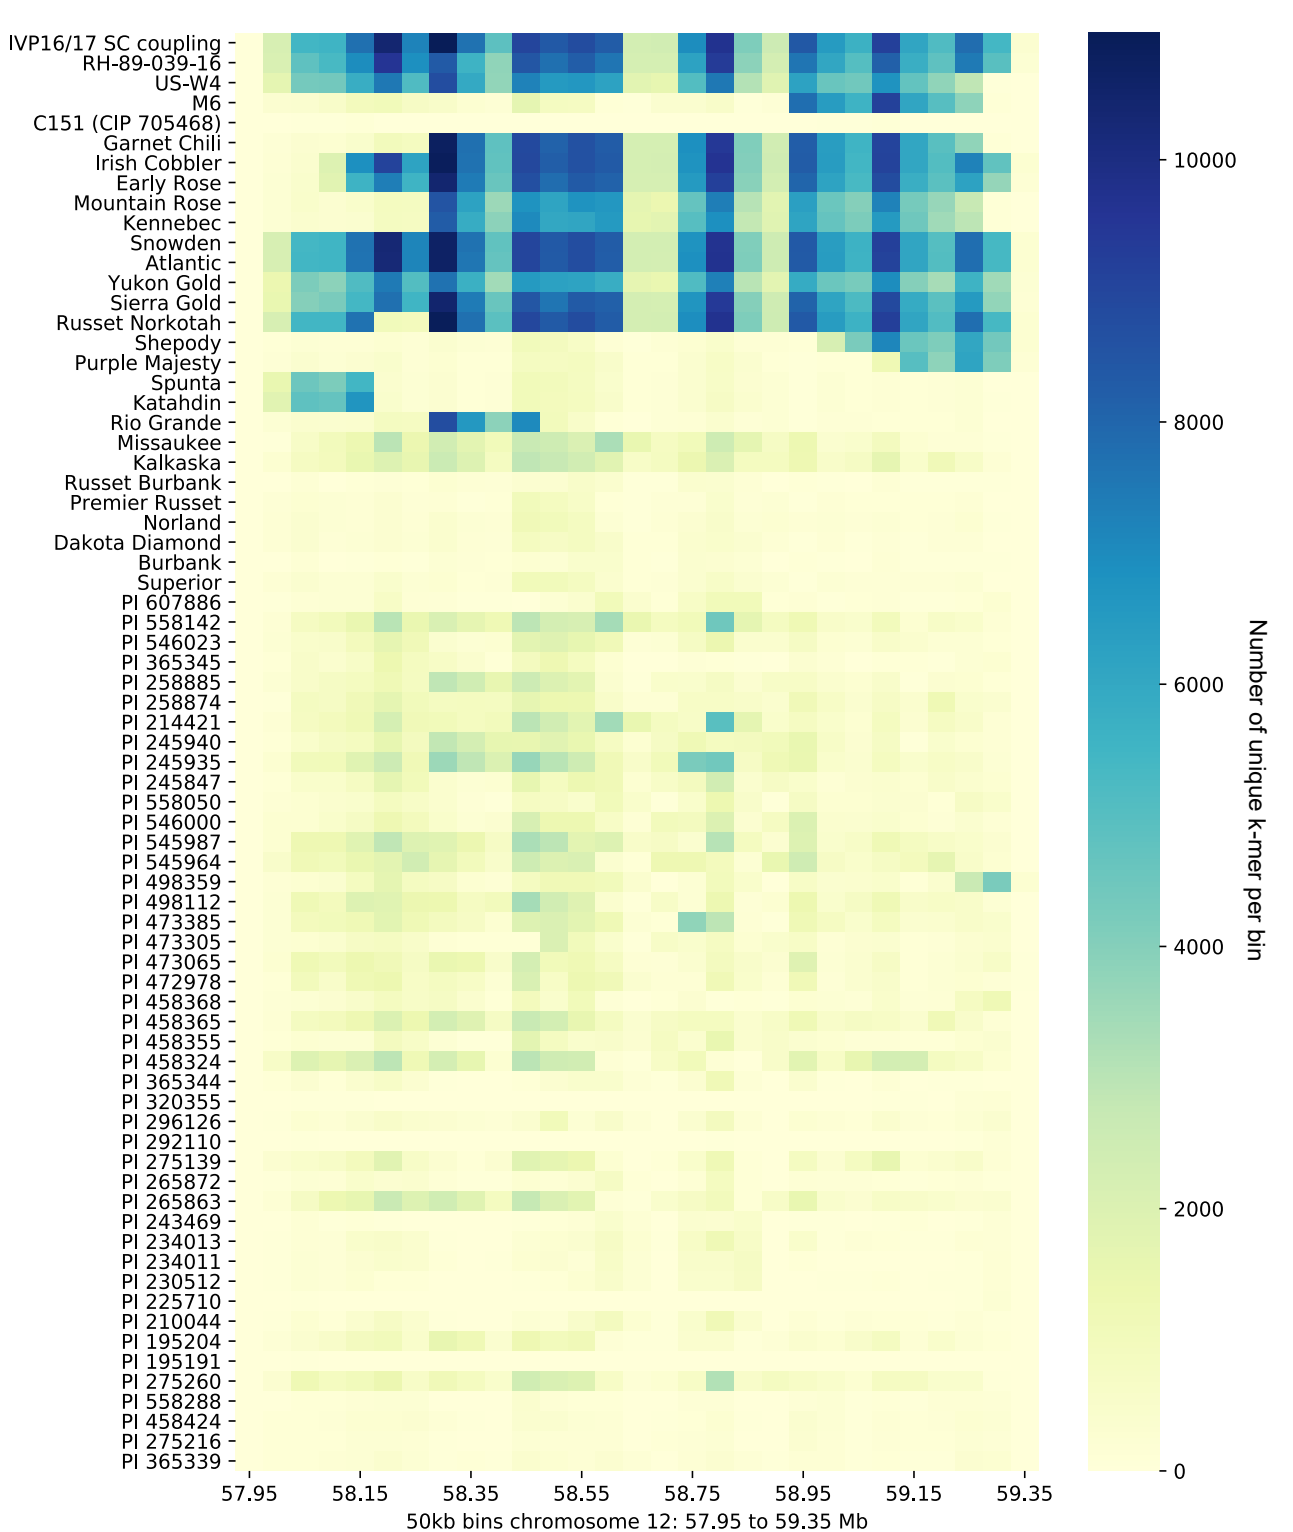

Supplement: 122_2020_3627_MOESM7_ESM.pdf [file 122_2020_3627_MOESM7_ESM.pdf]
